# Supplementary material for: Synthesis and characterization of the first trimetallic nitride templated pyrrolidino endohedral metallofullerenes
Source: Royal Society of Chemistry journal article supplement (doi:10.1039/b503333k), 2005-01-01

## Synthesis and Characterization of the First Trimetallic Nitride Template Endohedral Metallofulleropyrrolidines

Ting Cai, Zhongxin Ge, Erick B. Iezzi, Thomas E. Glass, Kim Harich  
Harry W. Gibson and Harry C. Dorn\*

Department of Chemistry, Virginia Polytechnic Institute and State University,  
Blacksburg, VA, USA 24061-0212

### Experimental Details

#### ◆ Synthesis and Isolation

##### 1. Sc<sub>3</sub>N@C<sub>80</sub> pyrrolidine derivative **2a** (natural abundance carbon):

To a solution of 5.0 mg (4.5 μmol) of Sc<sub>3</sub>N@C<sub>80</sub> in 50 mL of *o*-dichlorobenzene, 1.2 mg (14 μmol) of N-methylglycine and 1.6 mg (53 μmol) of paraformaldehyde were added. The mixture was heated at 110°C in oil bath for 10 h. The solvent was removed *in vacuo* and the crude solid was purified by silica gel column chromatography (eluent: *o*-dichlorobenzene). The collected solid was dissolved in CS<sub>2</sub> and injected into an HPLC for final purification. HPLC condition: PYE [2-1-(pyrenyl)ethyl silica] column (10 × 250 mm), mobile phase (CS<sub>2</sub>), flow rate: 0.5 mL/min, λ = 390 nm. This led to the isolation of 2 mg (40%) of pure **2a** as a black solid.

##### 2. Sc<sub>3</sub>N@C<sub>80</sub> pyrrolidine derivative **2a** (99% <sup>13</sup>C labeled)

To a solution of 2.0 mg (1.8 μmol) of Sc<sub>3</sub>N@C<sub>80</sub> in 30 mL of *o*-dichlorobenzene, 0.7 mg (9 μmol) of N-methylglycine and 3 μL (0.03 mmol) of formaldehyde (99% <sup>13</sup>C, ~20% W/W in H<sub>2</sub>O) (Cambridge Isotope Laboratory, Inc.) were added. The product was purified as indicated above. This led to the isolation of 0.6 mg (30%) of pure **2a** as a black solid.

##### 3. Er<sub>3</sub>N@C<sub>80</sub> pyrrolidine derivative **2b** (99% <sup>13</sup>C labeled)

To a solution of 2.2 mg (1.5 μmol) of Er<sub>3</sub>N@C<sub>80</sub> in 30 mL of *o*-dichlorobenzene, 0.6 mg (7 μmol) of N-methylglycine and 2~3 μL (0.02 mmol) of formaldehyde (99% <sup>13</sup>C, ~20% W/W in H<sub>2</sub>O) (Cambridge Isotope Laboratory, Inc.) were added. The product was purified as indicated above. This led to the isolation of 0.7 mg (30%) of pure **2b** as a black solid.

◆ HPLC trace of monoadduct **2a** and unreacted  $\text{Sc}_3\text{N}@\text{C}_{80}$  (**1a**).

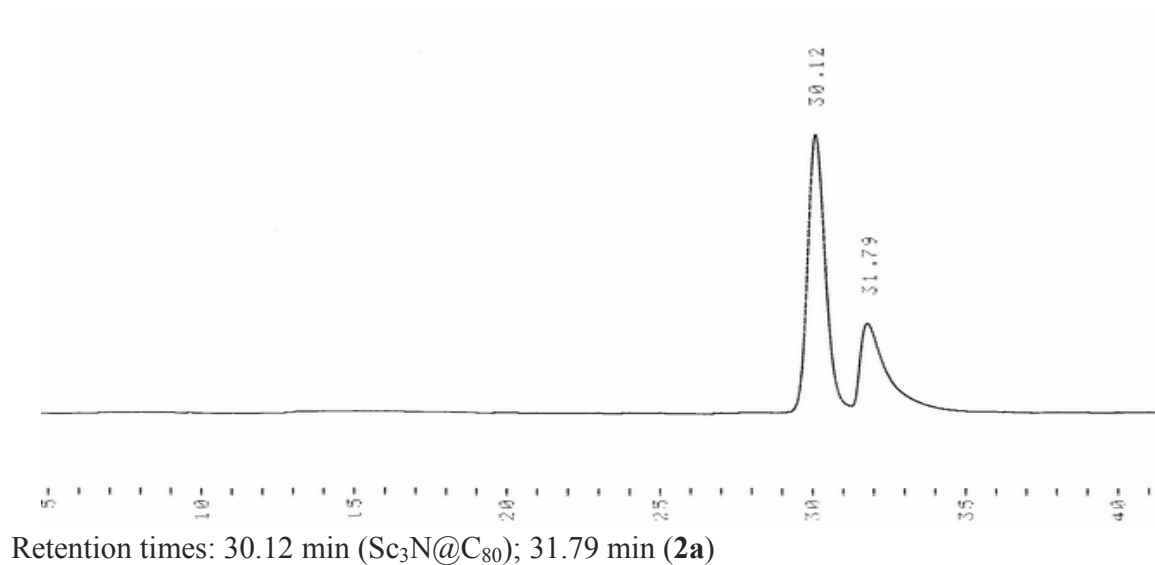

◆ HPLC trace of monoadduct **2b** and unreacted  $\text{Er}_3\text{N}@\text{C}_{80}$  (**1b**).

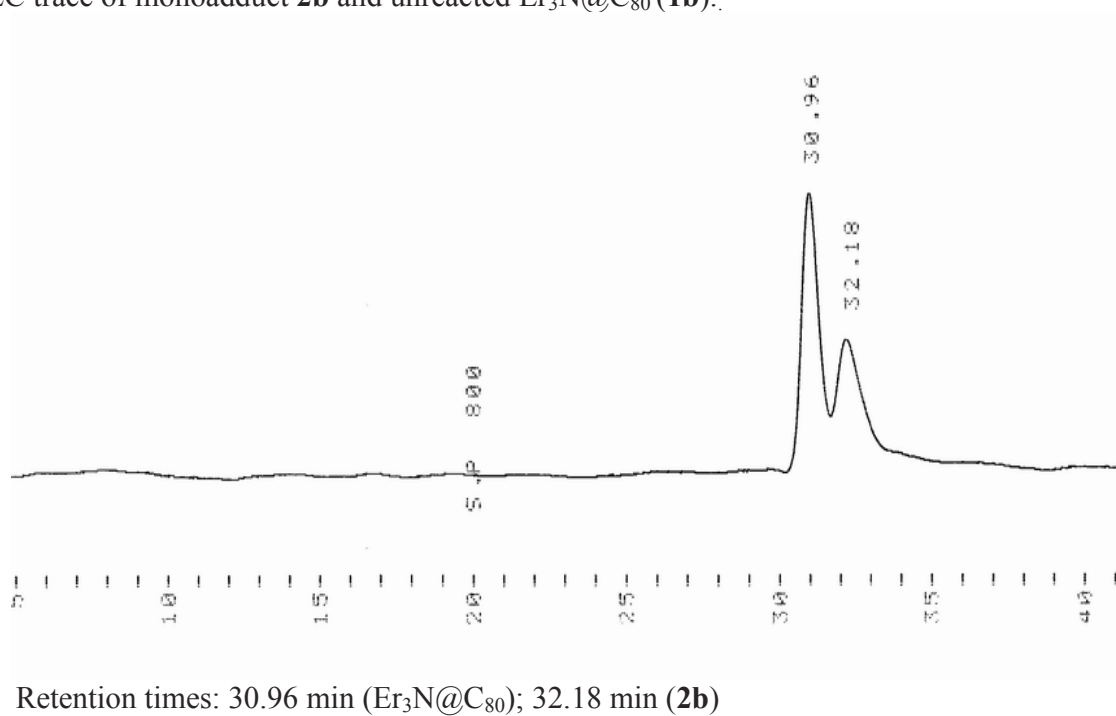

◆ Comparison of computer simulated mass spectra with experimental mass spectra  
(Assuming  $A_3N_2C_{83}H_8$  is equivalent to  $A_3N_2C_{83}H_7$  with one carbon which is 100%  $^{13}C$  labeled)

1. Computer simulated mass spectrum of the molecule with formula of  $Sc_3N_2C_{83}H_8$  (top)  
Experimental mass spectrum of **2a** (99%  $^{13}C$  labeled) (bottom)

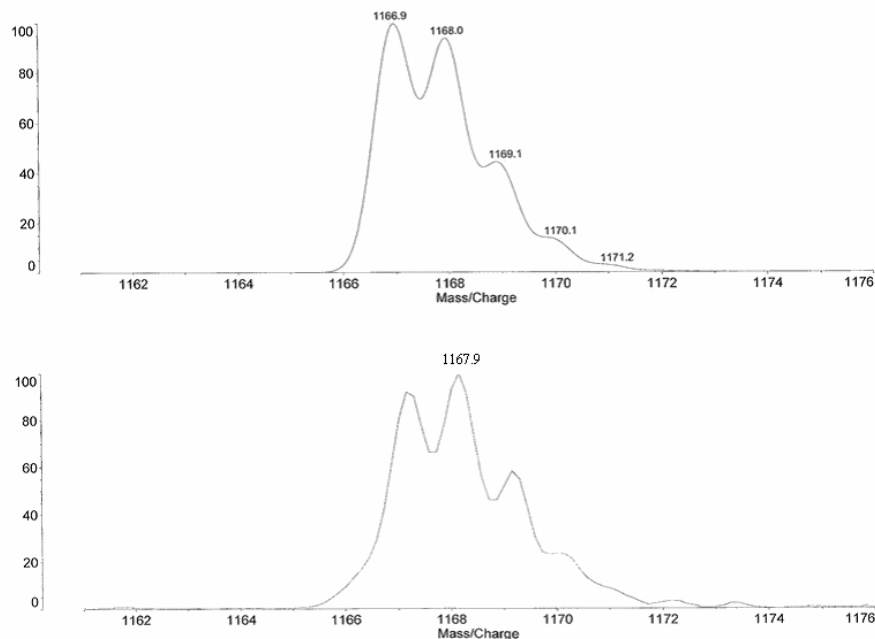

2. Computer simulated mass spectrum of the molecule with formula of  $Er_3N_2C_{83}H_8$  (top)  
Experimental mass spectrum of **2b** (99%  $^{13}C$  labeled) (bottom)

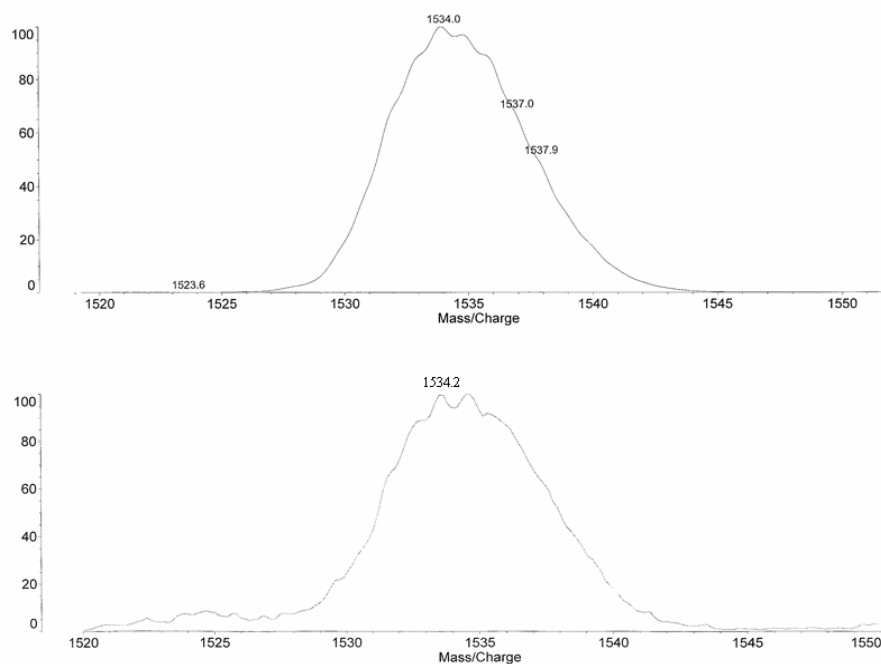

Supplement: b503333k.pdf [file b503333k.pdf]
